# Supplementary material for: Nutraceutical Chewing Candy Formulations Based on Acetic, Alcoholic, and Lactofermented Apple Juice Products
Source: MDPI journal article supplement (doi:10.3390/foods10102329), 2021-09-30
Supplement: s1 [file s1]

**Supplementary file 1.** Volatile compounds profile.

Table S1. Nonfermented frozen apple juice volatile compounds profile.

| RT, min | Volatile compound                             | Nonfer-mented<br>frozen apple juice |
|---------|-----------------------------------------------|-------------------------------------|
| 2.471   | Ethyl Acetate                                 | 0.000                               |
| 3.05    | 1-Butanol                                     | 3.307                               |
| 4.373   | 1-Butanol, 3-methyl-                          | 0.000                               |
| 5.861   | Butyrate <ethyl->                             | 0.983                               |
| 6.159   | Propanoic acid, 2-hydroxy-, ethyl ester, (S)- | 0.000                               |
| 6.21    | Acetic acid, butyl ester                      | 10.916                              |
| 7.594   | 1-Hexanol                                     | 30.661                              |
| 10.245  | Formate <heptyl->                             | 0.418                               |
| 10.492  | Hexanoic acid                                 | 0.523                               |
| 10.724  | 5-Hepten-2-one, 6-methyl-                     | 0.194                               |
| 10.882  | Hept-5-en-2-ol <6-methyl->                    | 0.465                               |
| 10.947  | Butanoate <butyl->                            | 3.637                               |
| 11.022  | Hexanoic acid, ethyl ester                    | 0.000                               |
| 11.402  | Acetic acid, hexyl ester                      | 18.652                              |
| 11.775  | 1-Hexanol, 2-ethyl-                           | 0.407                               |
| 11.896  | Benzyl alcohol                                | 0.000                               |
| 12.1    | Butyl 2-methylbutanoate                       | 0.400                               |
| 12.175  | Benzeneacetaldehyde                           | 0.000                               |
| 12.28   | 3-Octen-1-ol                                  | 0.039                               |
| 12.514  | Ethyl dl-2-hydroxycaproate                    | 0.000                               |
| 12.531  | 3,3-Dimethyl-2-pentanol                       | 0.000                               |
| 12.541  | Butanoate, <2-Methylbutyl ->                  | 0.000                               |
| 12.595  | Bicyclo[2.2.1]heptane, 2-methyl-              | 0.069                               |

|        |                                         |       |
|--------|-----------------------------------------|-------|
| 12.803 | 1-Octanol                               | 4.612 |
| 13.318 | Linalool oxide <cis->                   | 0.098 |
| 13.504 | Heptanoic acid, ethyl ester             | 0.116 |
| 13.538 | 1,6-Octadien-3-ol, 3,7-dimethyl-        | 0.178 |
| 13.65  | cis-1,2-Cyclohexanedimethanol           | 0.810 |
| 13.817 | Acetic acid, nonyl ester                | 0.279 |
| 13.911 | Phenethyl alcohol                       | 0.000 |
| 13.955 | Hexanoic acid, 2-ethyl-                 | 0.346 |
| 14.095 | Octanoate <methyl->                     | 0.000 |
| 14.235 | Butanoic acid, 3-hydroxy-, butyl ester  | 0.314 |
| 14.312 | 2-Undecene, 4-methyl-                   | 0.183 |
| 14.553 | (S)-(+)-6-Methyl-1-octanol              | 0.166 |
| 14.666 | Butyrate <hexyl->                       | 0.121 |
| 14.745 | Hexanoate <isobutyl->                   | 0.000 |
| 14.944 | 2-Nonenal, (E)-                         | 0.022 |
| 15.071 | Acetic acid, phenylmethyl ester         | 0.077 |
| 15.125 | Phenol, 4-ethyl-                        | 0.000 |
| 15.333 | Benzoic acid, ethyl ester               | 0.000 |
| 15.383 | Butanedioic acid, diethyl ester         | 0.000 |
| 15.472 | Octanoic acid                           | 0.000 |
| 15.69  | Butanoic acid, hexyl ester              | 5.304 |
| 15.783 | Octanoate <ethyl->                      | 0.000 |
| 15.999 | Decanal                                 | 0.027 |
| 16.02  | 2-Hexanol, 3,4-dimethyl-                | 0.000 |
| 16.038 | 3.beta.-Methyl-trans-hexahydrophthalide | 0.014 |
| 16.096 | Acetic acid, octyl ester                | 0.798 |
| 16.158 | 4-Octanol, 2,4-dimethyl-                | 0.000 |
| 16.287 | 3-Pentanone, 2,2,4,4-tetramethyl-       | 0.020 |
| 16.385 | Phenoxyethanol                          | 0.000 |
| 16.492 | Citronellol                             | 0.000 |
| 16.66  | 2-Methylbicyclo[4.3.0]non-1(6)-ene      | 0.000 |
| 16.704 | Butanoic acid, 2-methyl-, hexyl ester   | 1.435 |

|        |                                                                  |       |
|--------|------------------------------------------------------------------|-------|
| 17.049 | Chavicol                                                         | 0.000 |
| 17.093 | Geraniol                                                         | 0.000 |
| 17.174 | 1,3-Octanediol                                                   | 2.869 |
| 17.218 | Cyclooctene, 3-ethenyl-                                          | 1.011 |
| 17.338 | Nonanoic acid                                                    | 2.259 |
| 17.444 | 1-Decanol                                                        | 0.000 |
| 17.655 | Dodecane, 2,6,10-trimethyl-                                      | 0.000 |
| 17.668 | 1-Hexanol, 5-methyl-2-(1-methylethyl)-                           | 0.000 |
| 17.674 | Methyl undecyl ether                                             | 0.000 |
| 17.807 | 2-Pyrazoline, 3-ethyl-1-isopropyl-                               | 1.003 |
| 17.933 | 2-Undecanone                                                     | 0.000 |
| 17.936 | Undecan-2-one                                                    | 0.000 |
| 17.94  | Nonanoate <ethyl->                                               | 0.000 |
| 18.011 | Indole                                                           | 0.105 |
| 18.077 | Methyl nonyl carbinol                                            | 0.000 |
| 18.161 | Formamide, N,N-dibutyl-                                          | 0.000 |
| 18.335 | 2,4-Decadien-1-ol, (E,E)-                                        | 0.000 |
| 18.41  | Guaiacol <4-vinyl->                                              | 0.000 |
| 18.679 | Ethanol, 2-(2-butoxyethoxy)-, acetate                            | 0.000 |
| 18.74  | Hydrocinnamic acid                                               | 0.000 |
| 18.787 | Octanoic acid <4-ethyl->                                         | 0.000 |
| 18.98  | n-PROPYL NONYL ETHER                                             | 0.000 |
| 19.138 | 10-Methyl-3,4,5,8,9,10-hexahydrooxecin-2-one                     | 0.261 |
| 19.247 | 2,2,4-Trimethyl-1,3-pentanediol diisobutyrate                    | 0.281 |
| 19.322 | 3-Allyl-6-methoxyphenol                                          | 0.000 |
| 19.358 | n-Decanoic acid                                                  | 0.000 |
| 19.475 | Succinic acid, butyl ethyl ester                                 | 0.000 |
| 19.558 | 2-Hydroxypentadecyl propanoate                                   | 0.000 |
| 19.686 | Propanoic acid, 2-methyl-, 3-hydroxy-2,4,4-trimethylpentyl ester | 0.555 |
| 19.849 | Butyl caprylate                                                  | 1.390 |

|        |                                                                  |       |
|--------|------------------------------------------------------------------|-------|
| 19.912 | 2-Buten-1-one, 1-(2,6,6-trimethyl-1,3-cyclohexadien-1-yl)-, (E)- | 0.171 |
| 19.959 | Nonadien-1-yl acetate, <3,6->                                    | 0.115 |
| 19.974 | Decanoate <ethyl->                                               | 0.000 |
| 20.068 | Tetradecane                                                      | 0.035 |
| 20.194 | Methyleugenol                                                    | 0.096 |
| 20.263 | Dodecanal                                                        | 0.033 |
| 20.401 | 2,4,7,9-Tetramethyl-5-decyn-4,7-diol                             | 0.061 |
| 20.624 | Butanedioic acid, ethyl 3-methylbutyl ester                      | 0.000 |
| 20.701 | Succinic acid, ethyl 3-pentyl ester                              | 0.000 |
| 20.742 | 1-Hexadecanol, 2-methyl-                                         | 0.000 |
| 21     | Octanoic acid, 3-methylbutyl ester                               | 0.000 |
| 21.045 | (Z)6,(Z)9-Pentadecadien-1-ol                                     | 0.286 |
| 21.146 | 5,9,13-Pentadecatrien-2-one, 6,10,14-trimethyl-, (E,E)-          | 0.165 |
| 21.249 | 2-Isopropyl-5-methyl-1-heptanol                                  | 0.191 |
| 21.263 | Undecanoic acid                                                  | 0.000 |
| 21.526 | Dodecanol                                                        | 0.000 |
| 21.576 | 2,5-Cyclohexadiene-1,4-dione, 2,6-bis(1,1-dimethylethyl)-        | 0.841 |
| 21.615 | 1-Heptanol, 2,4-diethyl-                                         | 0.000 |
| 21.682 | Oxalic acid, cyclobutyl octadecyl ester                          | 0.000 |
| 22.206 | Farnesene <(E,E)-, alpha->                                       | 0.309 |
| 22.275 | Phenol, 2,4-bis(1,1-dimethylethyl)-                              | 0.543 |
| 22.486 | Dichloroacetic acid, 4-hexadecyl ester                           | 0.000 |
| 22.486 | n-Tridecan-1-ol                                                  | 0.000 |
| 22.564 | Hexadecane, 1,16-dichloro-                                       | 0.000 |
| 22.569 | 1-Decanol, 2-methyl-                                             | 0.000 |
| 22.807 | Octatriacontane <n->                                             | 0.000 |
| 23.08  | Dodecanoic acid                                                  | 0.000 |
| 23.242 | 1,6,10-Dodecatrien-3-ol, 3,7,11-trimethyl-, (E)-                 | 0.010 |
| 23.546 | Hexamethylene diacrylate                                         | 0.178 |
| 23.704 | Dodecanoate <ethyl->                                             | 0.000 |

|                      |                                                                                            |       |
|----------------------|--------------------------------------------------------------------------------------------|-------|
| 23.81                | Hexadecane                                                                                 | 0.044 |
| 23.871               | Propanoic acid, 2-methyl-, 1-(1,1-dimethylethyl)-2-methyl-1,3-propanediyl ester            | 0.303 |
| 24.083               | Tetradecanal                                                                               | 0.000 |
| 24.175               | Tricyclo[4.4.0.0(2,7)]dec-8-ene-3-methanol, .alpha.,.alpha.,6,8-tetramethyl-, stereoisomer | 0.030 |
| 24.285               | Dodecanoic acid, 1-methylethyl ester                                                       | 0.000 |
| 24.608               | Pentadecanoic acid, 3-methylbutyl ester                                                    | 0.000 |
| 24.87                | Dihydrojasmonate <methyl-, cis->                                                           | 0.000 |
| 25.447               | 6,10-Dodecadien-1-ol, 3,7,11-trimethyl-, (E)-(.+/-.)-                                      | 0.000 |
| 25.615               | Methanone, (1-hydroxycyclohexyl)phenyl-                                                    | 0.026 |
| 25.992               | trans-Geranylgeraniol                                                                      | 0.000 |
| 26.62                | Dibutyl adipate                                                                            | 0.013 |
| 26.822               | 3,5-di-tert-Butyl-4-hydroxybenzaldehyde                                                    | 0.032 |
| 27.068               | Tetradecanoate <ethyl->                                                                    | 0.000 |
| 27.313               | 2-Propanol, 1-chloro-, phosphate (3:1)                                                     | 0.022 |
| 28.348               | 1,2-Benzenedicarboxylic acid, bis(2-methylpropyl) ester                                    | 0.166 |
| 29.199               | 7,9-Di-tert-butyl-1-oxaspiro(4,5)deca-6,9-diene-2,8-dione                                  | 0.921 |
| 29.743               | Dibutyl phthalate                                                                          | 0.086 |
| 30.066               | Palmitate <ethyl->                                                                         | 0.000 |
| RT – retention time. |                                                                                            |       |

Table S2. Cider samples volatile compounds profile.

| RT, min | Volatile compound | C No.1 | C No.2 | C No.3 | C No.4 |
|---------|-------------------|--------|--------|--------|--------|
| 2.471   | Ethyl Acetate     | 0.000  | 0.000  | 0.000  | 0.000  |
| 3.05    | 1-Butanol         | 0.000  | 0.000  | 0.000  | 0.000  |

|        |                                               |        |        |        |        |
|--------|-----------------------------------------------|--------|--------|--------|--------|
| 4.373  | 1-Butanol, 3-methyl-                          | 27.939 | 22.967 | 29.107 | 18.910 |
| 5.861  | Butyrate <ethyl->                             | 0.000  | 0.000  | 0.000  | 0.000  |
| 6.159  | Propanoic acid, 2-hydroxy-, ethyl ester, (S)- | 0.000  | 2.064  | 0.000  | 1.321  |
| 6.21   | Acetic acid, butyl ester                      | 0.000  | 0.000  | 0.000  | 0.000  |
| 7.594  | 1-Hexanol                                     | 6.409  | 5.969  | 9.218  | 5.272  |
| 10.245 | Formate <heptyl->                             | 0.157  | 0.074  | 0.092  | 0.075  |
| 10.492 | Hexanoic acid                                 | 1.449  | 1.581  | 1.661  | 0.000  |
| 10.724 | 5-Hepten-2-one, 6-methyl-                     | 0.000  | 0.000  | 0.000  | 0.000  |
| 10.882 | Hept-5-en-2-ol <6-methyl->                    | 0.158  | 0.157  | 0.117  | 0.233  |
| 10.947 | Butanoate <butyl->                            | 0.000  | 0.000  | 0.000  | 0.000  |
| 11.022 | Hexanoic acid, ethyl ester                    | 1.996  | 4.254  | 3.856  | 3.777  |
| 11.402 | Acetic acid, hexyl ester                      | 0.110  | 0.371  | 0.267  | 0.139  |
| 11.775 | 1-Hexanol, 2-ethyl-                           | 0.231  | 0.191  | 0.359  | 0.230  |
| 11.896 | Benzyl alcohol                                | 0.094  | 0.048  | 0.000  | 0.000  |
| 12.1   | Butyl 2-methylbutanoate                       | 0.000  | 0.059  | 0.000  | 0.081  |
| 12.175 | Benzeneacetaldehyde                           | 0.000  | 0.000  | 0.000  | 0.000  |
| 12.28  | 3-Octen-1-ol                                  | 0.014  | 0.000  | 0.000  | 0.000  |
| 12.514 | Ethyl dl-2-hydroxycaproate                    | 0.186  | 0.047  | 0.042  | 0.046  |
| 12.531 | 3,3-Dimethyl-2-pentanol                       | 0.000  | 0.000  | 0.000  | 0.000  |
| 12.541 | Butanoate, <2-Methylbutyl ->                  | 0.000  | 0.000  | 0.000  | 0.000  |
| 12.595 | Bicyclo[2.2.1]heptane, 2-methyl-              | 0.000  | 0.000  | 0.000  | 0.000  |
| 12.803 | 1-Octanol                                     | 2.127  | 1.269  | 0.000  | 1.085  |
| 13.318 | Linalool oxide <cis->                         | 0.110  | 0.000  | 0.000  | 0.000  |
| 13.504 | Heptanoic acid, ethyl ester                   | 0.000  | 0.000  | 0.000  | 0.000  |
| 13.538 | 1,6-Octadien-3-ol, 3,7-dimethyl-              | 0.000  | 0.107  | 0.122  | 0.103  |
| 13.65  | cis-1,2-Cyclohexanedimethanol                 | 0.406  | 0.224  | 0.263  | 0.182  |
| 13.817 | Acetic acid, nonyl ester                      | 0.000  | 0.000  | 0.000  | 0.000  |
| 13.911 | Phenethyl alcohol                             | 11.596 | 7.929  | 9.996  | 8.472  |
| 13.955 | Hexanoic acid, 2-ethyl-                       | 0.000  | 0.000  | 0.000  | 0.000  |
| 14.095 | Octanoate <methyl->                           | 0.000  | 0.006  | 0.000  | 0.006  |
| 14.235 | Butanoic acid, 3-hydroxy-, butyl ester        | 0.102  | 0.062  | 0.119  | 0.088  |

|        |                                         |       |       |       |        |
|--------|-----------------------------------------|-------|-------|-------|--------|
| 14.312 | 2-Undecene, 4-methyl-                   | 0.164 | 0.111 | 0.184 | 0.138  |
| 14.553 | (S)-(+)-6-Methyl-1-octanol              | 0.116 | 0.080 | 0.127 | 0.106  |
| 14.666 | Butyrate <hexyl->                       | 0.000 | 0.000 | 0.000 | 0.000  |
| 14.745 | Hexanoate <isobutyl->                   | 0.000 | 0.000 | 0.000 | 0.000  |
| 14.944 | 2-Nonenal, (E)-                         | 0.000 | 0.000 | 0.000 | 0.000  |
| 15.071 | Acetic acid, phenylmethyl ester         | 0.000 | 0.000 | 0.000 | 0.000  |
| 15.125 | Phenol, 4-ethyl-                        | 0.000 | 0.000 | 0.000 | 0.000  |
| 15.333 | Benzoic acid, ethyl ester               | 0.008 | 0.000 | 0.000 | 0.000  |
| 15.383 | Butanedioic acid, diethyl ester         | 8.758 | 4.782 | 0.000 | 4.784  |
| 15.472 | Octanoic acid                           | 0.000 | 7.109 | 4.036 | 0.000  |
| 15.69  | Butanoic acid, hexyl ester              | 0.101 | 0.000 | 0.000 | 12.521 |
| 15.783 | Octanoate <ethyl->                      | 1.781 | 8.036 | 6.767 | 5.890  |
| 15.999 | Decanal                                 | 0.117 | 0.177 | 0.103 | 0.136  |
| 16.02  | 2-Hexanol, 3,4-dimethyl-                | 0.000 | 0.000 | 0.000 | 0.000  |
| 16.038 | 3.beta.-Methyl-trans-hexahydrophthalide | 0.000 | 0.000 | 0.000 | 0.000  |
| 16.096 | Acetic acid, octyl ester                | 0.000 | 0.000 | 0.000 | 0.000  |
| 16.158 | 4-Octanol, 2,4-dimethyl-                | 1.407 | 0.000 | 0.000 | 0.000  |
| 16.287 | 3-Pentanone, 2,2,4,4-tetramethyl-       | 0.000 | 0.023 | 0.000 | 0.033  |
| 16.385 | Phenoxyethanol                          | 0.000 | 0.000 | 0.000 | 0.000  |
| 16.492 | Citronellol                             | 0.436 | 0.104 | 0.179 | 0.000  |
| 16.66  | 2-Methylbicyclo[4.3.0]non-1(6)-ene      | 0.000 | 0.000 | 0.000 | 0.000  |
| 16.704 | Butanoic acid, 2-methyl-, hexyl ester   | 0.000 | 0.020 | 0.027 | 0.000  |
| 17.049 | Chavicol                                | 0.577 | 0.373 | 0.344 | 0.664  |
| 17.093 | Geraniol                                | 0.000 | 0.000 | 0.000 | 0.000  |
| 17.174 | 1,3-Octanediol                          | 3.456 | 0.780 | 1.472 | 0.541  |
| 17.218 | Cyclooctene, 3-ethenyl-                 | 0.000 | 0.000 | 0.000 | 0.000  |
| 17.338 | Nonanoic acid                           | 4.766 | 2.072 | 6.467 | 5.404  |
| 17.444 | 1-Decanol                               | 0.000 | 2.127 | 0.000 | 0.000  |
| 17.655 | Dodecane, 2,6,10-trimethyl-             | 0.000 | 0.000 | 0.000 | 0.000  |
| 17.668 | 1-Hexanol, 5-methyl-2-(1-methylethyl)-  | 0.000 | 0.000 | 0.000 | 0.000  |
| 17.674 | Methyl undecyl ether                    | 0.000 | 0.000 | 0.000 | 0.000  |
| 17.807 | 2-Pyrazoline, 3-ethyl-1-isopropyl-      | 0.000 | 0.544 | 0.797 | 0.637  |

|        |                                                                  |       |       |       |        |
|--------|------------------------------------------------------------------|-------|-------|-------|--------|
| 17.933 | 2-Undecanone                                                     | 0.000 | 0.000 | 0.000 | 0.000  |
| 17.936 | Undecan-2-one                                                    | 0.000 | 0.000 | 0.000 | 0.000  |
| 17.94  | Nonanoate <ethyl->                                               | 0.113 | 0.150 | 0.149 | 0.154  |
| 18.011 | Indole                                                           | 0.167 | 0.114 | 0.137 | 0.084  |
| 18.077 | Methyl nonyl carbinol                                            | 0.000 | 0.000 | 0.000 | 0.000  |
| 18.161 | Formamide, N,N-dibutyl-                                          | 0.000 | 0.000 | 0.000 | 0.098  |
| 18.335 | 2,4-Decadien-1-ol, (E,E)-                                        | 0.000 | 0.000 | 0.000 | 0.000  |
| 18.41  | Guaiacol <4-vinyl->                                              | 0.034 | 0.020 | 0.025 | 0.000  |
| 18.679 | Ethanol, 2-(2-butoxyethoxy)-, acetate                            | 0.000 | 0.000 | 0.000 | 0.000  |
| 18.74  | Hydrocinnamic acid                                               | 0.000 | 0.000 | 0.000 | 0.000  |
| 18.787 | Octanoic acid <4-ethyl->                                         | 0.149 | 0.088 | 0.000 | 0.111  |
| 18.98  | n-PROPYL NONYL ETHER                                             | 0.127 | 0.022 | 0.000 | 0.000  |
| 19.138 | 10-Methyl-3,4,5,8,9,10-hexahydrooxecin-2-one                     | 0.000 | 0.029 | 0.041 | 0.037  |
| 19.247 | 2,2,4-Trimethyl-1,3-pentanediol diisobutyrate                    | 0.153 | 0.114 | 0.196 | 0.147  |
| 19.322 | 3-Allyl-6-methoxyphenol                                          | 3.302 | 0.630 | 0.000 | 0.376  |
| 19.358 | n-Decanoic acid                                                  | 1.960 | 6.908 | 7.451 | 11.303 |
| 19.475 | Succinic acid, butyl ethyl ester                                 | 0.000 | 0.000 | 0.000 | 0.000  |
| 19.558 | 2-Hydroxypentadecyl propanoate                                   | 0.574 | 0.000 | 0.000 | 0.000  |
| 19.686 | Propanoic acid, 2-methyl-, 3-hydroxy-2,4,4-trimethylpentyl ester | 0.270 | 0.248 | 0.333 | 0.328  |
| 19.849 | Butyl caprylate                                                  | 0.000 | 0.000 | 0.000 | 0.000  |
| 19.912 | 2-Buten-1-one, 1-(2,6,6-trimethyl-1,3-cyclohexadien-1-yl)-, (E)- | 0.168 | 0.119 | 0.156 | 0.124  |
| 19.959 | Nonadien-1-yl acetate, <3,6->                                    | 0.000 | 0.000 | 0.000 | 0.000  |
| 19.974 | Decanoate <ethyl->                                               | 0.622 | 6.162 | 2.862 | 3.652  |
| 20.068 | Tetradecane                                                      | 0.064 | 0.042 | 0.043 | 0.047  |
| 20.194 | Methyleugenol                                                    | 0.322 | 0.053 | 0.000 | 0.000  |
| 20.263 | Dodecanal                                                        | 0.171 | 0.115 | 0.140 | 0.070  |
| 20.401 | 2,4,7,9-Tetramethyl-5-decyn-4,7-diol                             | 0.000 | 0.000 | 0.000 | 0.000  |



|        |                                                                                 |       |       |       |       |
|--------|---------------------------------------------------------------------------------|-------|-------|-------|-------|
| 20.624 | Butanedioic acid, ethyl 3-methylbutyl ester                                     | 0.630 | 0.297 | 0.000 | 0.275 |
| 20.701 | Succinic acid, ethyl 3-pentyl ester                                             | 0.000 | 0.000 | 0.000 | 0.058 |
| 20.742 | 1-Hexadecanol, 2-methyl-                                                        | 0.000 | 0.117 | 0.000 | 0.000 |
| 21     | Octanoic acid, 3-methylbutyl ester                                              | 0.000 | 0.097 | 0.093 | 0.000 |
| 21.045 | (Z)6,(Z)9-Pentadecadien-1-ol                                                    | 0.000 | 0.000 | 0.000 | 0.000 |
| 21.146 | 5,9,13-Pentadecatrien-2-one, 6,10,14-trimethyl-, (E,E)-                         | 0.308 | 0.120 | 0.000 | 0.087 |
| 21.249 | 2-Isopropyl-5-methyl-1-heptanol                                                 | 0.000 | 0.000 | 0.000 | 0.000 |
| 21.263 | Undecanoic acid                                                                 | 0.532 | 0.323 | 0.313 | 0.350 |
| 21.526 | Dodecanol                                                                       | 0.000 | 0.000 | 0.000 | 0.000 |
| 21.576 | 2,5-Cyclohexadiene-1,4-dione, 2,6-bis(1,1-dimethylethyl)-                       | 2.286 | 1.427 | 1.523 | 1.454 |
| 21.615 | 1-Heptanol, 2,4-diethyl-                                                        | 0.000 | 0.000 | 0.157 | 0.188 |
| 21.682 | Oxalic acid, cyclobutyl octadecyl ester                                         | 0.484 | 0.263 | 0.000 | 0.344 |
| 22.206 | Farnesene <(E,E)-, alpha->                                                      | 0.000 | 0.000 | 0.049 | 0.000 |
| 22.275 | Phenol, 2,4-bis(1,1-dimethylethyl)-                                             | 5.651 | 3.521 | 2.495 | 3.777 |
| 22.486 | Dichloroacetic acid, 4-hexadecyl ester                                          | 0.138 | 0.000 | 0.000 | 0.000 |
| 22.486 | n-Tridecan-1-ol                                                                 | 0.000 | 0.054 | 0.000 | 0.000 |
| 22.564 | Hexadecane, 1,16-dichloro-                                                      | 0.000 | 0.000 | 0.000 | 0.000 |
| 22.569 | 1-Decanol, 2-methyl-                                                            | 0.000 | 0.000 | 0.000 | 0.151 |
| 22.807 | Octatriacontane <n->                                                            | 0.000 | 0.000 | 0.000 | 0.000 |
| 23.08  | Dodecanoic acid                                                                 | 0.282 | 0.430 | 0.648 | 0.493 |
| 23.242 | 1,6,10-Dodecatrien-3-ol, 3,7,11-trimethyl-, (E)-                                | 0.383 | 0.122 | 0.100 | 0.073 |
| 23.546 | Hexamethylene diacrylate                                                        | 0.227 | 0.127 | 0.211 | 0.190 |
| 23.704 | Dodecanoate <ethyl->                                                            | 0.113 | 0.158 | 0.341 | 0.303 |
| 23.81  | Hexadecane                                                                      | 0.067 | 0.044 | 0.000 | 0.054 |
| 23.871 | Propanoic acid, 2-methyl-, 1-(1,1-dimethylethyl)-2-methyl-1,3-propanediyl ester | 0.781 | 0.522 | 0.679 | 0.523 |
| 24.083 | Tetradecanal                                                                    | 0.000 | 0.000 | 0.000 | 0.000 |

|                                         |                                                                                            |       |       |       |       |
|-----------------------------------------|--------------------------------------------------------------------------------------------|-------|-------|-------|-------|
| 24.175                                  | Tricyclo[4.4.0.0(2,7)]dec-8-ene-3-methanol, .alpha.,.alpha.,6,8-tetramethyl-, stereoisomer | 0.043 | 0.000 | 0.000 | 0.000 |
| 24.285                                  | Dodecanoic acid, 1-methylethyl ester                                                       | 0.000 | 0.000 | 0.024 | 0.025 |
| 24.608                                  | Pentadecanoic acid, 3-methylbutyl ester                                                    | 0.000 | 0.000 | 0.000 | 0.000 |
| 24.87                                   | Dihydrojasmonate <methyl-, cis->                                                           | 0.000 | 0.000 | 0.000 | 0.000 |
| 25.447                                  | 6,10-Dodecadien-1-ol, 3,7,11-trimethyl-, (E)-(.+/-.)-                                      | 0.083 | 0.000 | 0.082 | 0.000 |
| 25.615                                  | Methanone, (1-hydroxycyclohexyl)phenyl-                                                    | 0.000 | 0.000 | 0.000 | 0.041 |
| 25.992                                  | trans-Geranylgeraniol                                                                      | 0.000 | 0.076 | 0.135 | 0.000 |
| 26.62                                   | Dibutyl adipate                                                                            | 0.054 | 0.032 | 0.048 | 0.039 |
| 26.822                                  | 3,5-di-tert-Butyl-4-hydroxybenzaldehyde                                                    | 0.175 | 0.112 | 0.149 | 0.125 |
| 27.068                                  | Tetradecanoate <ethyl->                                                                    | 0.046 | 0.049 | 0.068 | 0.061 |
| 27.313                                  | 2-Propanol, 1-chloro-, phosphate (3:1)                                                     | 0.070 | 0.039 | 0.053 | 0.029 |
| 28.348                                  | 1,2-Benzenedicarboxylic acid, bis(2-methylpropyl) ester                                    | 0.784 | 0.686 | 0.944 | 0.657 |
| 29.199                                  | 7,9-Di-tert-butyl-1-oxaspiro(4,5)deca-6,9-diene-2,8-dione                                  | 3.408 | 2.337 | 3.745 | 2.584 |
| 29.743                                  | Dibutyl phthalate                                                                          | 0.457 | 0.481 | 0.802 | 0.526 |
| 30.066                                  | Palmitate <ethyl->                                                                         | 0.022 | 0.035 | 0.084 | 0.074 |
| RT – retention time; C – cider samples. |                                                                                            |       |       |       |       |

Table S3. Fermented apple juice volatile compounds profile.

| RT,<br>min | Volatile compound | Frozen apple juice                                 |       |         |       | Fresh apple juice |       |          |       |
|------------|-------------------|----------------------------------------------------|-------|---------|-------|-------------------|-------|----------|-------|
|            |                   | Lactic acid bacteria strains used for fermentation |       |         |       |                   |       |          |       |
|            |                   | LUHS 122                                           |       | LUHS210 |       | LUHS 122          |       | LUHS 210 |       |
|            |                   | Duration of fermentation, hours                    |       |         |       |                   |       |          |       |
|            |                   | 24                                                 | 48    | 24      | 48    | 24                | 48    | 24       | 48    |
| 2.471      | Ethyl Acetate     | 0.000                                              | 0.000 | 0.000   | 0.000 | 0.000             | 2.834 | 2.388    | 0.000 |
| 3.05       | 1-Butanol         | 3.578                                              | 4.496 | 5.591   | 4.992 | 1.300             | 1.473 | 1.565    | 1.902 |

|        |                                               |        |               |        |        |        |        |        |        |
|--------|-----------------------------------------------|--------|---------------|--------|--------|--------|--------|--------|--------|
| 4.373  | 1-Butanol, 3-methyl-                          | 0.884  | <b>0.620</b>  | 2.361  | 1.867  | 1.728  | 4.065  | 8.333  | 10.256 |
| 5.861  | Butyrate <ethyl->                             | 1.035  | <b>0.811</b>  | 0.000  | 0.000  | 0.816  | 1.059  | 0.000  | 0.000  |
| 6.159  | Propanoic acid, 2-hydroxy-, ethyl ester, (S)- | 0.000  | <b>0.000</b>  | 0.000  | 0.000  | 0.000  | 0.000  | 0.000  | 0.000  |
| 6.21   | Acetic acid, butyl ester                      | 11.664 | <b>10.620</b> | 1.796  | 1.778  | 9.171  | 1.966  | 0.991  | 1.102  |
| 7.594  | 1-Hexanol                                     | 36.389 | <b>40.461</b> | 49.134 | 44.828 | 33.086 | 38.704 | 36.939 | 40.181 |
| 10.245 | Formate <heptyl->                             | 0.505  | <b>0.501</b>  | 0.643  | 0.622  | 0.505  | 0.495  | 0.360  | 0.412  |
| 10.492 | Hexanoic acid                                 | 0.913  | <b>1.070</b>  | 1.245  | 1.109  | 1.046  | 1.479  | 1.441  | 1.672  |
| 10.724 | 5-Hepten-2-one, 6-methyl-                     | 0.240  | <b>0.270</b>  | 0.404  | 0.399  | 0.280  | 0.313  | 0.331  | 0.393  |
| 10.882 | Hept-5-en-2-ol <6-methyl->                    | 0.536  | <b>0.599</b>  | 1.017  | 0.902  | 0.600  | 0.648  | 0.841  | 1.513  |
| 10.947 | Butanoate <butyl->                            | 2.476  | <b>2.204</b>  | 0.903  | 0.989  | 2.523  | 1.444  | 0.514  | 0.000  |
| 11.022 | Hexanoic acid, ethyl ester                    | 0.000  | <b>0.000</b>  | 0.000  | 0.000  | 0.000  | 0.000  | 1.454  | 1.689  |
| 11.402 | Acetic acid, hexyl ester                      | 8.414  | <b>5.536</b>  | 3.175  | 2.984  | 6.376  | 3.944  | 2.715  | 3.071  |
| 11.775 | 1-Hexanol, 2-ethyl-                           | 0.663  | <b>0.599</b>  | 0.871  | 9.407  | 8.146  | 8.880  | 8.132  | 8.867  |
| 11.896 | Benzyl alcohol                                | 0.189  | <b>0.166</b>  | 0.000  | 0.000  | 0.000  | 0.000  | 0.000  | 0.000  |
| 12.1   | Butyl 2-methylbutanoate                       | 0.000  | <b>0.000</b>  | 0.000  | 0.000  | 0.184  | 0.168  | 0.000  | 0.130  |
| 12.175 | Benzeneacetaldehyde                           | 0.409  | <b>0.311</b>  | 0.526  | 0.497  | 0.000  | 0.000  | 0.000  | 0.000  |
| 12.28  | 3-Octen-1-ol                                  | 0.085  | <b>0.077</b>  | 0.078  | 0.072  | 0.063  | 0.000  | 0.000  | 0.000  |
| 12.514 | Ethyl dl-2-hydroxycaproate                    | 0.000  | <b>0.092</b>  | 0.000  | 0.000  | 0.000  | 0.038  | 0.000  | 0.000  |
| 12.531 | 3,3-Dimethyl-2-pentanol                       | 0.000  | <b>0.000</b>  | 0.000  | 0.153  | 0.000  | 0.000  | 0.117  | 0.166  |
| 12.541 | Butanoate, <2-Methylbutyl ->                  | 0.000  | <b>0.000</b>  | 0.000  | 0.000  | 0.000  | 0.000  | 0.000  | 0.000  |
| 12.595 | Bicyclo[2.2.1]heptane, 2-methyl-              | 0.039  | <b>0.077</b>  | 0.062  | 0.091  | 0.034  | 0.000  | 0.000  | 0.000  |
| 12.803 | 1-Octanol                                     | 4.299  | <b>4.065</b>  | 3.979  | 4.092  | 3.236  | 2.670  | 1.234  | 1.400  |
| 13.318 | Linalool oxide <cis->                         | 0.318  | <b>0.194</b>  | 0.300  | 0.305  | 0.523  | 0.217  | 0.282  | 0.277  |
| 13.504 | Heptanoic acid, ethyl ester                   | 0.000  | <b>0.000</b>  | 0.000  | 0.000  | 0.000  | 0.000  | 0.166  | 0.224  |
| 13.538 | 1,6-Octadien-3-ol, 3,7-dimethyl-              | 0.200  | <b>0.182</b>  | 0.281  | 0.257  | 0.000  | 0.000  | 0.311  | 0.322  |
| 13.65  | cis-1,2-Cyclohexanedimethanol                 | 0.726  | <b>0.709</b>  | 0.951  | 0.902  | 0.930  | 0.902  | 0.881  | 1.104  |
| 13.817 | Acetic acid, nonyl ester                      | 0.000  | <b>0.000</b>  | 0.000  | 0.000  | 0.000  | 0.000  | 0.000  | 0.000  |
| 13.911 | Phenethyl alcohol                             | 0.661  | <b>0.835</b>  | 0.963  | 0.496  | 1.411  | 2.617  | 3.481  | 3.814  |
| 13.955 | Hexanoic acid, 2-ethyl-                       | 0.709  | <b>0.512</b>  | 0.715  | 0.554  | 0.611  | 0.000  | 0.000  | 0.000  |
| 14.095 | Octanoate <methyl->                           | 0.000  | <b>0.000</b>  | 0.000  | 0.000  | 0.036  | 0.047  | 0.000  | 0.000  |
| 14.235 | Butanoic acid, 3-hydroxy-, butyl ester        | 0.358  | <b>0.354</b>  | 0.399  | 0.388  | 0.362  | 0.380  | 0.354  | 0.394  |
| 14.312 | 2-Undecene, 4-methyl-                         | 0.279  | <b>0.232</b>  | 0.286  | 0.284  | 0.240  | 0.275  | 0.315  | 0.326  |

|        |                                         |       |              |       |       |       |       |       |       |
|--------|-----------------------------------------|-------|--------------|-------|-------|-------|-------|-------|-------|
| 14.553 | (S)-(+)-6-Methyl-1-octanol              | 0.197 | <b>0.184</b> | 0.209 | 0.221 | 0.169 | 0.189 | 0.260 | 0.287 |
| 14.666 | Butyrate <hexyl->                       | 0.000 | <b>0.000</b> | 0.000 | 0.000 | 0.000 | 0.000 | 0.000 | 0.000 |
| 14.745 | Hexanoate <isobutyl->                   | 0.000 | <b>0.000</b> | 0.000 | 0.000 | 0.000 | 0.000 | 0.065 | 0.096 |
| 14.944 | 2-Nonenal, (E)-                         | 0.032 | <b>0.000</b> | 0.000 | 0.048 | 0.000 | 0.000 | 0.030 | 0.051 |
| 15.071 | Acetic acid, phenylmethyl ester         | 0.000 | <b>0.000</b> | 0.000 | 0.000 | 0.000 | 0.000 | 0.000 | 0.000 |
| 15.125 | Phenol, 4-ethyl-                        | 0.000 | <b>0.000</b> | 0.000 | 0.000 | 0.388 | 0.000 | 0.000 | 0.000 |
| 15.333 | Benzoic acid, ethyl ester               | 0.000 | <b>0.000</b> | 0.000 | 0.000 | 0.000 | 0.000 | 0.000 | 0.000 |
| 15.383 | Butanedioic acid, diethyl ester         | 0.000 | <b>0.000</b> | 0.000 | 0.000 | 0.000 | 0.000 | 0.000 | 0.000 |
| 15.472 | Octanoic acid                           | 0.000 | <b>0.000</b> | 0.000 | 0.000 | 0.000 | 0.000 | 0.000 | 0.000 |
| 15.69  | Butanoic acid, hexyl ester              | 0.626 | <b>0.666</b> | 0.411 | 0.523 | 0.425 | 0.448 | 0.431 | 0.506 |
| 15.783 | Octanoate <ethyl->                      | 0.116 | <b>0.000</b> | 0.252 | 0.233 | 0.267 | 0.639 | 2.261 | 2.660 |
| 15.999 | Decanal                                 | 0.089 | <b>0.000</b> | 0.188 | 0.000 | 0.000 | 0.000 | 0.000 | 0.000 |
| 16.02  | 2-Hexanol, 3,4-dimethyl-                | 0.000 | <b>0.084</b> | 0.000 | 0.141 | 0.093 | 0.000 | 0.102 | 0.000 |
| 16.038 | 3.beta.-Methyl-trans-hexahydrophthalide | 0.000 | <b>0.000</b> | 0.000 | 0.000 | 0.000 | 0.000 | 0.000 | 0.000 |
| 16.096 | Acetic acid, octyl ester                | 0.000 | <b>0.000</b> | 0.000 | 0.000 | 0.000 | 0.000 | 0.000 | 0.000 |
| 16.158 | 4-Octanol, 2,4-dimethyl-                | 0.000 | <b>0.000</b> | 0.000 | 0.000 | 0.000 | 0.000 | 0.000 | 0.000 |
| 16.287 | 3-Pentanone, 2,2,4,4-tetramethyl-       | 0.035 | <b>0.026</b> | 0.059 | 0.000 | 0.000 | 0.031 | 0.023 | 0.024 |
| 16.385 | Phenoxyethanol                          | 0.000 | <b>0.000</b> | 0.042 | 0.000 | 0.000 | 0.000 | 0.000 | 0.000 |
| 16.492 | Citronellol                             | 0.000 | <b>0.000</b> | 0.000 | 0.000 | 0.000 | 0.000 | 0.000 | 0.000 |
| 16.66  | 2-Methylbicyclo[4.3.0]non-1(6)-ene      | 0.000 | <b>0.000</b> | 0.000 | 0.000 | 0.000 | 0.000 | 0.000 | 0.000 |
| 16.704 | Butanoic acid, 2-methyl-, hexyl ester   | 0.189 | <b>0.130</b> | 0.532 | 0.467 | 0.108 | 0.142 | 0.212 | 0.227 |
| 17.049 | Chavicol                                | 0.000 | <b>0.000</b> | 0.000 | 0.000 | 0.000 | 0.000 | 0.000 | 0.000 |
| 17.093 | Geraniol                                | 0.000 | <b>0.000</b> | 0.000 | 0.000 | 0.610 | 0.000 | 0.202 | 0.000 |
| 17.174 | 1,3-Octanediol                          | 2.630 | <b>3.127</b> | 5.480 | 5.039 | 4.331 | 3.228 | 4.904 | 5.798 |
| 17.218 | Cyclooctene, 3-ethenyl-                 | 0.952 | <b>0.737</b> | 0.000 | 0.000 | 0.000 | 0.867 | 0.000 | 0.000 |
| 17.338 | Nonanoic acid                           | 4.478 | <b>5.529</b> | 5.198 | 5.365 | 4.486 | 6.319 | 5.518 | 2.191 |
| 17.444 | 1-Decanol                               | 0.000 | <b>0.000</b> | 0.000 | 0.000 | 0.000 | 0.000 | 0.000 | 0.399 |
| 17.655 | Dodecane, 2,6,10-trimethyl-             | 0.000 | <b>0.079</b> | 0.100 | 0.000 | 0.000 | 0.000 | 0.000 | 0.000 |
| 17.668 | 1-Hexanol, 5-methyl-2-(1-methylethyl)-  | 0.000 | <b>0.000</b> | 0.000 | 0.000 | 0.000 | 0.105 | 0.000 | 0.063 |
| 17.674 | Methyl undecyl ether                    | 0.000 | <b>0.000</b> | 0.000 | 0.000 | 0.139 | 0.000 | 0.133 | 0.000 |
| 17.807 | 2-Pyrazoline, 3-ethyl-1-isopropyl-      | 1.447 | <b>1.304</b> | 1.620 | 0.000 | 0.000 | 0.000 | 0.000 | 0.000 |
| 17.933 | 2-Undecanone                            | 0.303 | <b>0.000</b> | 0.000 | 0.000 | 0.330 | 0.000 | 0.000 | 0.000 |

|        |                                                                  |       |              |       |       |       |       |       |       |
|--------|------------------------------------------------------------------|-------|--------------|-------|-------|-------|-------|-------|-------|
| 17.936 | Undecan-2-one                                                    | 0.000 | <b>0.000</b> | 0.132 | 0.000 | 0.000 | 0.000 | 0.000 | 0.000 |
| 17.94  | Nonanoate <ethyl->                                               | 0.000 | <b>0.000</b> | 0.000 | 0.000 | 0.000 | 0.143 | 0.460 | 0.324 |
| 18.011 | Indole                                                           | 0.110 | <b>0.111</b> | 0.110 | 0.111 | 0.090 | 0.099 | 0.083 | 0.064 |
| 18.077 | Methyl nonyl carbinol                                            | 0.000 | <b>0.000</b> | 0.000 | 0.000 | 0.066 | 0.000 | 0.000 | 0.000 |
| 18.161 | Formamide, N,N-dibutyl-                                          | 0.000 | <b>0.000</b> | 0.000 | 0.165 | 0.111 | 0.102 | 0.102 | 0.109 |
| 18.335 | 2,4-Decadien-1-ol, (E,E)-                                        | 0.000 | <b>0.000</b> | 0.000 | 0.029 | 0.000 | 0.000 | 0.000 | 0.000 |
| 18.41  | Guaiacol <4-vinyl->                                              | 0.000 | <b>0.000</b> | 0.000 | 0.000 | 0.000 | 0.000 | 0.000 | 0.000 |
| 18.679 | Ethanol, 2-(2-butoxyethoxy)-, acetate                            | 0.000 | <b>0.000</b> | 0.000 | 0.000 | 0.000 | 0.000 | 0.295 | 0.000 |
| 18.74  | Hydrocinnamic acid                                               | 0.000 | <b>0.000</b> | 0.000 | 0.000 | 0.000 | 0.000 | 0.000 | 0.000 |
| 18.787 | Octanoic acid <4-ethyl->                                         | 0.000 | <b>0.000</b> | 0.000 | 0.000 | 0.000 | 0.000 | 0.000 | 0.000 |
| 18.98  | n-PROPYL NONYL ETHER                                             | 0.183 | <b>0.180</b> | 0.000 | 0.000 | 0.134 | 0.000 | 0.000 | 0.000 |
| 19.138 | 10-Methyl-3,4,5,8,9,10-hexahydrooxecin-2-one                     | 0.199 | <b>0.227</b> | 0.164 | 0.165 | 0.205 | 0.244 | 0.173 | 0.187 |
| 19.247 | 2,2,4-Trimethyl-1,3-pentanediol diisobutyrate                    | 0.328 | <b>0.325</b> | 0.360 | 0.284 | 0.267 | 0.285 | 0.353 | 0.355 |
| 19.322 | 3-Allyl-6-methoxyphenol                                          | 1.913 | <b>0.000</b> | 0.000 | 0.000 | 3.495 | 2.118 | 3.340 | 0.000 |
| 19.358 | n-Decanoic acid                                                  | 0.000 | <b>1.664</b> | 0.000 | 1.024 | 0.000 | 0.000 | 0.000 | 0.000 |
| 19.475 | Succinic acid, butyl ethyl ester                                 | 0.000 | <b>0.000</b> | 0.000 | 0.000 | 0.000 | 0.000 | 0.000 | 0.000 |
| 19.558 | 2-Hydroxypentadecyl propanoate                                   | 0.000 | <b>0.000</b> | 0.000 | 0.000 | 0.000 | 0.000 | 0.000 | 0.000 |
| 19.686 | Propanoic acid, 2-methyl-, 3-hydroxy-2,4,4-trimethylpentyl ester | 0.540 | <b>0.492</b> | 0.571 | 0.472 | 0.451 | 0.440 | 0.620 | 0.626 |
| 19.849 | Butyl caprylate                                                  | 0.307 | <b>0.162</b> | 0.000 | 0.000 | 0.000 | 0.000 | 0.000 | 0.000 |
| 19.912 | 2-Buten-1-one, 1-(2,6,6-trimethyl-1,3-cyclohexadien-1-yl)-, (E)- | 0.085 | <b>0.109</b> | 0.158 | 0.168 | 0.250 | 0.153 | 0.164 | 0.205 |
| 19.959 | Nonadien-1-yl acetate, <3,6->                                    | 0.000 | <b>0.000</b> | 0.000 | 0.000 | 0.000 | 0.000 | 0.000 | 0.000 |
| 19.974 | Decanoate <ethyl->                                               | 0.000 | <b>0.068</b> | 0.000 | 0.000 | 0.000 | 0.124 | 0.177 | 0.220 |
| 20.068 | Tetradecane                                                      | 0.074 | <b>0.058</b> | 0.056 | 0.061 | 0.091 | 0.113 | 0.082 | 0.092 |
| 20.194 | Methyleugenol                                                    | 0.095 | <b>0.090</b> | 0.081 | 0.105 | 0.074 | 0.084 | 0.083 | 0.120 |
| 20.263 | Dodecanal                                                        | 0.078 | <b>0.073</b> | 0.076 | 0.039 | 0.052 | 0.066 | 0.054 | 0.050 |
| 20.401 | 2,4,7,9-Tetramethyl-5-decyn-4,7-diol                             | 0.067 | <b>0.077</b> | 0.000 | 0.000 | 0.000 | 0.000 | 0.000 | 0.000 |
| 20.624 | Butanedioic acid, ethyl 3-methylbutyl ester                      | 0.000 | <b>0.000</b> | 0.000 | 0.000 | 0.000 | 0.000 | 0.000 | 0.000 |
| 20.701 | Succinic acid, ethyl 3-pentyl ester                              | 0.000 | <b>0.000</b> | 0.000 | 0.000 | 0.000 | 0.000 | 0.000 | 0.000 |

|        |                                                                                            |       |              |       |       |       |       |       |       |
|--------|--------------------------------------------------------------------------------------------|-------|--------------|-------|-------|-------|-------|-------|-------|
| 20.742 | 1-Hexadecanol, 2-methyl-                                                                   | 0.000 | <b>0.000</b> | 0.000 | 0.000 | 0.000 | 0.000 | 0.000 | 0.000 |
| 21     | Octanoic acid, 3-methylbutyl ester                                                         | 0.000 | <b>0.000</b> | 0.000 | 0.000 | 0.000 | 0.000 | 0.000 | 0.000 |
| 21.045 | (Z)6,(Z)9-Pentadecadien-1-ol                                                               | 0.000 | <b>0.000</b> | 0.000 | 0.000 | 0.000 | 0.000 | 0.000 | 0.000 |
| 21.146 | 5,9,13-Pentadecatrien-2-one, 6,10,14-trimethyl-, (E,E)-                                    | 0.000 | <b>0.050</b> | 0.068 | 0.067 | 0.000 | 0.062 | 0.000 | 0.082 |
| 21.249 | 2-Isopropyl-5-methyl-1-heptanol                                                            | 0.000 | <b>0.063</b> | 0.299 | 0.266 | 0.000 | 0.364 | 0.245 | 0.000 |
| 21.263 | Undecanoic acid                                                                            | 0.000 | <b>0.000</b> | 0.000 | 0.000 | 0.000 | 0.000 | 0.000 | 0.000 |
| 21.526 | Dodecanol                                                                                  | 0.000 | <b>0.000</b> | 0.000 | 0.311 | 0.654 | 0.459 | 0.000 | 0.000 |
| 21.576 | 2,5-Cyclohexadiene-1,4-dione, 2,6-bis(1,1-dimethylethyl)-                                  | 0.572 | <b>0.657</b> | 0.650 | 0.581 | 0.560 | 0.580 | 0.850 | 0.539 |
| 21.615 | 1-Heptanol, 2,4-diethyl-                                                                   | 0.000 | <b>0.000</b> | 0.000 | 0.000 | 0.172 | 0.000 | 0.000 | 0.000 |
| 21.682 | Oxalic acid, cyclobutyl octadecyl ester                                                    | 0.000 | <b>0.000</b> | 0.256 | 0.000 | 0.000 | 0.000 | 0.000 | 0.000 |
| 22.206 | Farnesene <(E,E)-, alpha->                                                                 | 0.392 | <b>0.247</b> | 0.750 | 0.512 | 0.553 | 0.437 | 0.320 | 0.319 |
| 22.275 | Phenol, 2,4-bis(1,1-dimethylethyl)-                                                        | 3.155 | <b>2.588</b> | 2.171 | 1.837 | 3.867 | 3.726 | 2.312 | 2.189 |
| 22.486 | Dichloroacetic acid, 4-hexadecyl ester                                                     | 0.000 | <b>0.000</b> | 0.000 | 0.000 | 0.000 | 0.000 | 0.000 | 0.000 |
| 22.486 | n-Tridecan-1-ol                                                                            | 0.000 | <b>0.000</b> | 0.000 | 0.000 | 0.000 | 0.000 | 0.000 | 0.000 |
| 22.564 | Hexadecane, 1,16-dichloro-                                                                 | 0.000 | <b>0.000</b> | 0.000 | 0.000 | 0.000 | 0.149 | 0.000 | 0.000 |
| 22.569 | 1-Decanol, 2-methyl-                                                                       | 0.000 | <b>0.000</b> | 0.000 | 0.000 | 0.119 | 0.000 | 0.000 | 0.000 |
| 22.807 | Octatriacontane <n->                                                                       | 0.000 | <b>0.000</b> | 0.000 | 0.031 | 0.000 | 0.000 | 0.000 | 0.000 |
| 23.08  | Dodecanoic acid                                                                            | 0.098 | <b>0.085</b> | 0.058 | 0.037 | 0.166 | 0.088 | 0.067 | 0.032 |
| 23.242 | 1,6,10-Dodecatrien-3-ol, 3,7,11-trimethyl-, (E)-                                           | 0.000 | <b>0.000</b> | 0.000 | 0.000 | 0.000 | 0.000 | 0.000 | 0.000 |
| 23.546 | Hexamethylene diacrylate                                                                   | 0.257 | <b>0.249</b> | 0.345 | 0.287 | 0.317 | 0.306 | 0.307 | 0.325 |
| 23.704 | Dodecanoate <ethyl->                                                                       | 0.000 | <b>0.000</b> | 0.000 | 0.000 | 0.000 | 0.000 | 0.021 | 0.058 |
| 23.81  | Hexadecane                                                                                 | 0.067 | <b>0.063</b> | 0.000 | 0.092 | 0.117 | 0.101 | 0.090 | 0.104 |
| 23.871 | Propanoic acid, 2-methyl-, 1-(1,1-dimethylethyl)-2-methyl-1,3-propanediyl ester            | 0.435 | <b>0.361</b> | 0.289 | 0.250 | 0.339 | 0.254 | 0.201 | 0.170 |
| 24.083 | Tetradecanal                                                                               | 0.000 | <b>0.000</b> | 0.019 | 0.000 | 0.027 | 0.000 | 0.000 | 0.000 |
| 24.175 | Tricyclo[4.4.0.0(2,7)]dec-8-ene-3-methanol, .alpha.,.alpha.,6,8-tetramethyl-, stereoisomer | 0.000 | <b>0.000</b> | 0.000 | 0.000 | 0.000 | 0.000 | 0.000 | 0.000 |
